# Supplementary material for: Linking gene expression to productivity to unravel long- and short-term responses of seagrasses exposed to CO2 in volcanic vents
Source: PubMed Central journal article supplement (PMC5304229; doi:10.1038/srep42278), 2017-02-13
Supplement: srep42278-s1.pdf [file srep42278-s1.pdf]

1                   **ELECTRONIC SUPPLEMENTARY INFORMATION (SI)**

2

3   **TITLE**

4   Linking gene expression to productivity to unravel long- and short-term responses of  
5   seagrasses exposed to CO<sub>2</sub> in volcanic vents

6

7   **AUTHORS**

8   Irene Olivé, João Silva, Chiara Lauritano, Monya M. Costa, Miriam Ruocco, Gabriele  
9   Procaccini, Rui Santos

10

11

12   **APPENDIX 1**

13   **Supplementary information on Results.** Selection, stability and ranking of reference  
14   genes in *Cymodocea nodosa*. Results of two-way ANOVA test on productivity of *C. nodosa*.

15

16   **Table S1.** Selection of reference genes in *Cymodocea nodosa* based on the BestKeeper  
17   approach<sup>1</sup>. Lowest standard deviation (SD) is underlined. *n*, number of plant samples  
18   in the tested conditions; GM, geometric mean of C<sub>T</sub>-value; AM, arithmetic mean of  
19   C<sub>T</sub>-value; Min and Max, the extreme values of C<sub>T</sub>; SD, standard deviation of C<sub>T</sub>;  
20   CV, coefficient of variance as percentage.

|           | <b>18S</b> | <b>eIF4A</b> | <b>GAPDH</b> | <b>UBI</b> |
|-----------|------------|--------------|--------------|------------|
| <i>n</i>  | 12         | 12           | 12           | 12         |
| GM [CT]   | 22.53      | 27.83        | 26.05        | 27.31      |
| AM [CT]   | 22.54      | 27.83        | 26.06        | 27.31      |
| min [CT]  | 21.43      | 26.91        | 25.12        | 26.44      |
| max [CT]  | 23.38      | 28.72        | 27.26        | 28.23      |
| SD [± CT] | 0.50       | <u>0.35</u>  | 0.55         | 0.46       |
| CV [% CT] | 2.23       | 1.28         | 2.12         | 1.67       |

21

22 **Table S2.** Expression stability of candidate RGs as calculated by geNorm<sup>2</sup> in *Cymodocea*  
 23 *nodosa*. Best candidate genes are underlined.

| Gene name | Average expression stability ( <i>M</i> ) |
|-----------|-------------------------------------------|
| eIF4A     | <u>0.60</u>                               |
| GAPDH     | <u>0.60</u>                               |
| 18S       | 0.71                                      |
| UBI       | 0.83                                      |

24

25

26 **Table S3.** Expression stability of candidate RGs as calculated by NormFinder<sup>3</sup> in *Cymodocea*  
 27 *nodosa*. Best candidate genes are underlined.

| Gene name | Stability value | Standard error |
|-----------|-----------------|----------------|
| eIF4A     | <u>0.07</u>     | 0.10           |
| 18S       | 0.25            | 0.07           |
| GAPDH     | 0.25            | 0.07           |
| UBI       | 0.31            | 0.08           |

28

29

30 **Table S4.** Ranking of the reference gene candidates by BestKeeper, geNorm, and  
 31 NormFinder. The three best RGs selected for RT-qPCR assays are highlighted in  
 32 bold. S.D.: standard deviation; Stab. Val.: stability value; *M*: average expression  
 33 stability.

| Bestkeeper          | NormFinder          | geNorm              |
|---------------------|---------------------|---------------------|
| (S.D.)              | (Stab. Val.)        | ( <i>M</i> )        |
| <b>eIF4A</b> (0.35) | <b>eIF4A</b> (0.07) | <b>eIF4A</b> (0.60) |
| UBI (0.46)          | <b>18S</b> (0.25)   | <b>GAPDH</b> (0.60) |
| 18S (0.50)          | GAPDH (0.25)        | 18S (0.71)          |
| GAPDH (0.55)        | UBI (0.31)          | UBI (0.83)          |

34

35

36 **Table S5.** Results of ANOSIM multivariate gene expression analysis. *In situ* incubations  
 37 indicate gene expression of CO<sub>2</sub> plants incubated in CO<sub>2</sub> water with respect to  
 38 Reference plants incubated in Reference water. Transplant incubations (Reference  
 39 plants) indicate gene expression of Reference plants incubated in CO<sub>2</sub> water with  
 40 respect to Reference plants incubated in Reference water. Transplant incubations  
 41 (CO<sub>2</sub> plants) indicate gene expression of CO<sub>2</sub> plants incubated in Reference water  
 42 with respect to CO<sub>2</sub> plants incubated in CO<sub>2</sub> water.

| <b>Global Test</b>                                 |                                        |                               |                                  |
|----------------------------------------------------|----------------------------------------|-------------------------------|----------------------------------|
|                                                    | <b>Sample statistic<br/>(Global R)</b> | <b>Significance<br/>level</b> | <b>Average<br/>dissimilarity</b> |
| <i>In situ</i> incubations                         | 0.37                                   | 10%                           | 10.39                            |
| Transplant incubations<br>(Reference plants)       | -0.074                                 | 70%                           | 8.08                             |
| Transplant incubations<br>(CO <sub>2</sub> plants) | 0.37                                   | 20%                           | 6.51                             |

43

44

45 **Table S6.** Relative expression report for RT-qPCR experiments obtained with REST  
 46 2009<sup>4</sup>. Expression values (with Standard error, Std. Error) and P(H1) (Probability of  
 47 alternate hypothesis that difference between sample and control groups is due only to  
 48 chance) are reported for each gene. (a) *In situ* incubations indicate relative gene  
 49 expression of CO<sub>2</sub> plants incubated in CO<sub>2</sub> water with respect to Reference plants  
 50 incubated in Reference water. (b) Transplant incubations (Reference plants) indicate  
 51 relative gene expression of Reference plants incubated in CO<sub>2</sub> water with respect to  
 52 Reference plants incubated in Reference water. (c) Transplant incubations (CO<sub>2</sub>  
 53 plants) indicate relative gene expression of CO<sub>2</sub> plants incubated in Reference water  
 54 with respect to CO<sub>2</sub> plants incubated in CO<sub>2</sub> water. Underlined values indicate P(H1)  
 55 < 0.1.

| <b>(a) In situ incubations</b> |                   |                   |              |
|--------------------------------|-------------------|-------------------|--------------|
| <b>Gene</b>                    | <b>Expression</b> | <b>Std. Error</b> | <b>P(H1)</b> |
| psaJ                           | -1.2235           | 0.5444            | 0.351        |
| psaC                           | -1.5637           | 0.3760            | 0.268        |
| psbA                           | -3.1933           | 0.2377            | 0.000 ***    |
| psbD                           | -1.1583           | 0.4907            | 0.330        |
| LHCA1                          | -6.1860           | 0.1217            | 0.000 ***    |
| FD                             | -2.1205           | 0.3018            | <u>0.058</u> |
| rbcL                           | -1.7125           | 0.2872            | 0.037 *      |
| ATPA                           | -1.0020           | 0.5949            | 0.461        |
| PEPC                           | -4.6031           | 0.2156            | <u>0.058</u> |
| SUS                            | -1.7949           | 0.2028            | 0.000 ***    |
| BCA                            | -4.3563           | 0.1641            | 0.000 ***    |
| SOD                            | -2.6559           | 0.2845            | 0.000 ***    |
| CAT                            | -2.1268           | 0.2985            | 0.107        |
| APX7                           | -1.7292           | 0.2444            | 0.000 ***    |
| APX6                           | -2.0806           | 0.3129            | 0.000 ***    |
| LBP                            | -1.4587           | 0.3902            | 0.000 ***    |
| GSH-S                          | -2.2658           | 0.2362            | 0.000 ***    |
| GR                             | -3.1383           | 0.2030            | 0.037 *      |
| MTP                            | -2.7702           | 0.1626            | 0.000 ***    |
| MT                             | -3.4187           | 0.2834            | 0.000 ***    |

56

57

**(b) Transplant incubations (Reference plants)**

| Gene  | Expression | Std. Error | P(H1)     |
|-------|------------|------------|-----------|
| psaJ  | -1.6625    | 0.6732     | 0.602     |
| psaC  | -2.0596    | 0.3616     | 0.212     |
| psbA  | -1.5462    | 0.2615     | 0.192     |
| psbD  | -1.6521    | 0.9551     | 0.704     |
| LHCA1 | 1.0088     | 0.6195     | 0.969     |
| FD    | 1.2004     | 1.1975     | 0.793     |
| rbcL  | -1.5319    | 0.4360     | 0.358     |
| ATPA  | -1.5760    | 0.6649     | 0.528     |
| PEPC  | -2.3135    | 0.1910     | 0.000 *** |
| SUS   | -1.1906    | 0.7741     | 0.778     |
| BCA   | -1.2465    | 0.3835     | 0.819     |
| SOD   | 1.2143     | 0.5284     | 0.713     |
| CAT   | -1.1480    | 0.4479     | 1.000     |
| APX7  | 1.1068     | 0.6279     | 0.704     |
| APX6  | -1.4624    | 0.3958     | 0.389     |
| LBP   | -1.2174    | 0.9836     | 0.894     |
| GSH-S | -1.8769    | 0.2877     | 0.212     |
| GR    | -1.7806    | 0.2851     | 0.000 *** |
| MTP   | -1.0744    | 0.9455     | 0.894     |
| MT    | -1.0346    | 0.3725     | 0.894     |

58

**(c) Transplant incubations (CO<sub>2</sub> plants)**

| Gene  | Expression | Std. Error | P(H1)        |
|-------|------------|------------|--------------|
| psaJ  | 1.5063     | 0.5530     | 0.000 ***    |
| psaC  | -1.7183    | 0.2825     | 0.127        |
| psbA  | 2.9783     | 2.2956     | <u>0.096</u> |
| psbD  | 2.0434     | 0.9608     | 0.190        |
| LHCA1 | 4.4506     | 2.5997     | <u>0.074</u> |
| FD    | 1.6250     | 1.6696     | 0.529        |
| rbcL  | 1.3850     | 0.6230     | 0.000 ***    |
| ATPA  | 1.1772     | 0.7049     | 0.704        |
| PEPC  | 2.1562     | 2.1473     | 0.497        |
| SUS   | 2.2300     | 0.8250     | <u>0.095</u> |
| BCA   | 2.6931     | 1.9187     | <u>0.096</u> |
| SOD   | 2.4607     | 1.7860     | 0.101        |
| CAT   | 1.9327     | 1.0148     | 0.000 ***    |
| APX7  | 1.7995     | 0.6850     | <u>0.095</u> |
| APX6  | 1.5200     | 0.7488     | 0.000 ***    |
| LBP   | 1.6729     | 0.7234     | 0.601        |
| GSH-S | 2.1214     | 0.9188     | 0.000 ***    |
| GR    | 3.7192     | 2.3486     | <u>0.096</u> |
| MTP   | 3.6992     | 1.5363     | <u>0.075</u> |
| MT    | 5.8535     | 5.7004     | 0.101        |

59

60 **Table S7.** Results of two-way ANOVA test (fixed crossed factors) to assess the effects of the  
 61 “origin” of the plants (plants from CO<sub>2</sub> or reference site) and the “water” used in the incubations  
 62 (water from CO<sub>2</sub> or reference site) of *Cymodocea nodosa* plants in Vulcano.

|                | <b>Df</b> | <b>Sum Sq</b> | <b>Mean Sq</b> | <b>F value</b> | <b>Pr(&gt;F)</b> |    |
|----------------|-----------|---------------|----------------|----------------|------------------|----|
| Origin         | 1         | 0.0796        | 0.0796         | 1.484          | 0.23457          |    |
| Water          | 1         | 0.6161        | 0.6161         | 11.481         | 0.00233          | ** |
| Origin x Water | 1         | 0.1448        | 0.1448         | 2.698          | 0.113            |    |
| Residuals      | 25        | 1.3415        | 0.0537         |                |                  |    |

63

64

65 **Table S8.** Results of Principal Components Analysis (PCA) conducted considering the  
 66 combined contributions of all GOIs and NPP. Percent variation explained by the first three axes  
 67 and individual contribution of NPP and targeted genes are indicated.

| PC    | Eigenvalue | %variance |         |
|-------|------------|-----------|---------|
| 1     | 9.2212     | 66.465    |         |
| 2     | 3.5521     | 25.603    |         |
| 3     | 1.1004     | 7.9316    |         |
|       | PC 1       | PC 2      | PC 3    |
| NPP   | 0.1737     | 0.0222    | 0.3656  |
| psaJ  | 0.0461     | 0.0163    | -0.0246 |
| psaC  | 0.0110     | 0.0999    | 0.5127  |
| psbA  | 0.2576     | 0.0840    | 0.0199  |
| psbD  | 0.0188     | 0.0812    | -0.2113 |
| LHCA1 | 0.2701     | 0.4156    | -0.1125 |
| FD    | 0.0487     | 0.2814    | 0.1668  |
| rbcL  | 0.0476     | 0.1879    | 0.0989  |
| ATPA  | -0.0107    | 0.0423    | 0.0005  |
| PEPC  | 0.3636     | 0.0326    | 0.2246  |
| SUS   | 0.0558     | 0.2356    | -0.1749 |
| BCA   | 0.1960     | 0.3233    | 0.1975  |
| SOD   | 0.3551     | -0.1987   | 0.0293  |
| CAT   | 0.2353     | 0.0265    | -0.3159 |
| APX7  | 0.0029     | 0.3011    | -0.0525 |
| APX6  | 0.1043     | 0.1223    | 0.2124  |
| LBP   | -0.0125    | 0.2373    | 0.0102  |
| GSH-S | 0.2933     | -0.1526   | -0.0730 |
| GR    | 0.4466     | -0.3454   | 0.1849  |
| MTP   | 0.0836     | 0.4169    | -0.1732 |
| MT    | 0.4055     | -0.0834   | -0.4116 |

68

69 **Table S9.** Spearman's rank correlation between Net plant productivity (NPP) and  
 70 mean gene expression from the incubations of *Cymodocea nodosa* plants in Vulcano.

|       | <b>Spearman coefficient (<math>\rho</math>)</b> | <b>p-value</b> |     |
|-------|-------------------------------------------------|----------------|-----|
| NPP   | 1                                               | 0              |     |
| psaJ  | 0.49                                            | 0.0064         | **  |
| psaC  | 0.3                                             | 0.1099         |     |
| psbA  | 0.49                                            | 0.0064         | **  |
| psbD  | -0.06                                           | 0.738          |     |
| LHCA1 | 0.49                                            | 0.0064         | **  |
| FD    | 0.29                                            | 0.132          |     |
| rbcL  | 0.29                                            | 0.132          |     |
| ATPA  | -0.15                                           | 0.4266         |     |
| PEPC  | 0.59                                            | 0.0007         | *** |
| SUS   | -0.27                                           | 0.1525         |     |
| BCA   | 0.29                                            | 0.132          |     |
| SOD   | 0.59                                            | 0.0007         | *** |
| CAT   | 0.29                                            | 0.1236         |     |
| APX7  | -0.07                                           | 0.7143         |     |
| APX6  | 0.29                                            | 0.132          |     |
| LBP   | -0.07                                           | 0.7143         |     |
| GSH-S | 0.39                                            | 0.0356         | *   |
| GR    | 0.59                                            | 0.0007         | *** |
| MTP   | -0.07                                           | 0.7143         |     |
| MT    | 0.29                                            | 0.1236         |     |

71

72 **APPENDIX 2**

73 **Supplementary information on Material and Methods.** Gene expression protocol  
74 and information on Reference genes (RGs) and Genes of interest (GOIs).

75

76 *RNA extraction and cDNA preparation*

77 RNA was extracted from *C. nodosa* leaves with the Aurum™ Total RNA Mini Kit  
78 (BIO-RAD) following manufacturer's instructions and retro-transcribed in cDNA  
79 with the iScript™ cDNA synthesis kit (BIO-RAD), according to standard protocol.  
80 RNA quantity and purity were assured by Nano-Drop (ND-1000 UV-Vis  
81 spectrophotometer; NanoDrop Technologies) and by gel electrophoresis. The 260/280  
82 nm and 260/230 nm ratios were always about 2.0, while gel electrophoresis showed  
83 intact RNA, with sharp ribosomal bands. Total RNA (500 ng) was retro-transcribed in  
84 cDNA with the iScript™ cDNA synthesis kit (BIO-RAD), according to standard  
85 protocol.

86

87 *Gene selection and RT-qPCR*

88 A Reverse Transcription -quantitative Polymerase Chain Reaction (RT-qPCR)  
89 analysis was performed in order to investigate differences in expression levels of  
90 genes belonging to pathways potentially affected by changes in CO<sub>2</sub> availability  
91 (photosynthesis, carbon utilization, free-radical detoxification and oxidative-stress  
92 response, and metal detoxification) (Supplementary Table S10).  
93 Given the lack of genomic (or transcriptomic) resources available for this species,  
94 specific primers for putative reference genes (RGs) and genes of interest (GOIs) were  
95 designed considering the alignment of conserved regions in other monocotyledons  
96 such as *Posidonia oceanica*, *Zostera marina*, *Oryza sativa*, *Zea mays*. Sequences were



97 identified using the search function in the seagrass EST database Dr. Zompo  
98 (<http://drzompo.uni-muenster.de>) or the generic online database GenBank  
99 (<http://www.ncbi.nlm.nih.gov/genbank>).

100 Alignments were performed with ClustalW embedded in BioEdit v. 7.0.5.3<sup>5</sup>. Primers  
101 were designed with the primer analysis software Primer3 v. 0.4.0<sup>6,7</sup> and Gene Runner  
102 v. 3.05 (Hasting Software, Inc.). Primers' selection conditions included primer length  
103 (18-23 bp),  $T_m$  (60°C), GC content ( $\geq 50\%$ ) and product size (130 to 230 bp). Primers  
104 for *SUS* and *rbcL* were designed from the known *C. nodosa* sequences available in the  
105 GenBank database (Acc. no. AM292651.2 and U80688.1, respectively). In some  
106 cases primer pairs established in previous works for closely related species were used  
107 (see references in Table S10).

108 To determine the specificity of the amplification, designed primer pairs were first  
109 tested in PCR, according to the reaction conditions detailed in<sup>8</sup>. Amplified PCR  
110 products were then analyzed by 1.5% agarose gel electrophoresis in TBE buffer. The  
111 resulting bands were excised from the gel and extracted with the GenElute<sup>TM</sup> Gel  
112 Extraction Kit (SIGMA). Sequence reactions were obtained with the BigDye  
113 Terminator Cycle Sequencing technology (Applied Biosystems, Foster City, CA),  
114 purified in automation using the Agencourt CleanSEQ Dye terminator removal Kit  
115 (Agencourt Bioscience Corporation, 500 Cummins Center, Suite 2450, Beverly MA  
116 01915 - USA) and a robotic station Biomek FX (Beckman Coulter, Fullerton, CA).  
117 Products were analyzed on an Automated Capillary Electrophoresis Sequencer 3730  
118 DNA Analyzer (Applied Biosystems). The identity of each sequence was confirmed  
119 using the blastn function. All obtained *C. nodosa* sequences are deposited in GenBank  
120 under the accession numbers shown in Table S10.

121 We set primers for 8 RGs and 20 GOIs, but 4 RGs (*L31*, *UBC13*, *EF1A* and *TBP*)  
122 were discarded due to double or no amplifications <sup>8</sup>  
123 RT-qPCR was performed in MicroAmp Optical 384-Well reaction plate (Applied  
124 Biosystems) with Optical Adhesive Covers (Applied Biosystems) on a Viiia7 Real  
125 Time PCR System (Applied Biosystems), using Sybr Green as fluorescence detection  
126 chemistry. The PCR consisted of 5  $\mu\text{L}$  Fast SYBR<sup>®</sup> Green Master Mix (Applied  
127 Biosystems), 1  $\mu\text{L}$  1:50-diluted cDNA template, and 0.7 pmol  $\mu\text{L}^{-1}$  of each primer, in  
128 a total reaction volume of 10  $\mu\text{L}$ . Thermal profile was as follows: 20 sec at 95°C, 40  
129 cycles of 1 sec at 95°C and 20 sec at 60°C. For determining the specificity of the  
130 reaction, the melting curve of each product from 60 to 95°C was also assessed. All  
131 RT-qPCR reactions were carried out in triplicate and each assay included three no-  
132 template negative controls (NTC) for each primer pair <sup>9</sup>. The technical variation  
133 among the triplicates was checked and individual outliers were excluded when the SD  
134 was more than 0.3.  
135 PCR efficiencies for all primer pairs have been calculated from the slopes of standard  
136 curves of the threshold cycle ( $C_T$ ) vs. cDNA concentration, with the equation  $E = 10^{-1/\text{slope}} - 1$ . Primer's sequences, percent efficiencies ( $E$ ) and regression coefficients ( $R^2$ )  
137 of RGs and GOIs are reported in Table S10. All  $E \geq 84\%$  and all  $R^2$  were  $\geq 0.97$ . To  
138 normalize target gene-expression data, three different algorithms BestKeeper <sup>1</sup>,  
139 geNorm <sup>2</sup> and NormFinder <sup>3</sup> were utilized to identify the best RGs in our  
140 experimental conditions, among the four candidate RGs selected for amplification: the  
141 Eukaryotic initiation factor 4A (eIF4A), the Glyceraldehyde 3-phosphate  
142 dehydrogenase (GAPDH), the 18S ribosomal RNA and the Ubiquitin (UBI). All RGs  
143 belong to different functional classes in order to reduce the possibility that they might  
144 be co-regulated. For the relative quantification of RT-qPCR data, we used REST-

146 MCS© (Relative Expression Software Tool) <sup>4</sup>. The mathematical model used is based  
147 on the correction for exact PCR efficiencies and the mean crossing point deviation  
148 between sample group(s) and control group(s), and it allows the use of multiple  
149 reference genes for the normalization of target gene expression levels <sup>10</sup>.

150

151 **TABLES**

152

153 **Table S10.** List of reference genes (RGs) and genes of interest (GOIs) in *Cymodocea nodosa* assessed using RT-qPCR. Gene symbol and  
 154 protein name, GenBank accession number, primer sequence, reference, amplicon size (S, base pair), percent of efficiency (*E*), correlation  
 155 coefficient ( $R^2$ ) and Swiss-Prot best hit with corresponding *E*-value are given.

| Gene symbol                     | Protein name                             | GenBank  | Primer Sequences 5' ->3'                               | Reference | S   | %E  | $R^2$ | Swiss-Prot best hit     | E-Value |
|---------------------------------|------------------------------------------|----------|--------------------------------------------------------|-----------|-----|-----|-------|-------------------------|---------|
| <i>Reference genes (RGs)</i>    |                                          |          |                                                        |           |     |     |       |                         |         |
| 18S                             | Ribosomal RNA 18S                        | KT200607 | F:AACGAGACCTCAGCCTGCTA<br>R:AAGATTACCCAAGCCTGTCG       | 8         | 200 | 100 | 0.97  | -                       | -       |
| eIF4A                           | Eukaryotic initiation factor 4A          | KT200591 | F:TTCTGCAAGGGTCTTGACGT<br>R:TCACACCCAAGTAGTCACCAAG     | 11        | 194 | 100 | 0.99  | sp Q40466.1 IF413_TOBAC | 2e-37   |
| GAPDH                           | Glyceraldehyde-3-phosphate dehydrogenase | KT200590 | F:AGGTTCTTCCTGCTTTGAATG<br>R:CTTCCTTGATTGCTGCCTTG      | 8         | 139 | 100 | 0.99  | sp P34783.1 G3P_ATRNU   | 5e-34   |
| UBI                             | Ubiquitin                                | KT200589 | F:CACCCTCGCTGACTACAACA<br>R:TTTCTCAGCCTGACGACCTT       | 8         | 195 | 96  | 0.99  | sp P31753.2 RS27A_ASPOF | 1e-18   |
| <i>Genes of interest (GOIs)</i> |                                          |          |                                                        |           |     |     |       |                         |         |
| psaJ                            | Photosystem I reaction center subunit IX | KT200587 | F:GGTTTGGGTCTTTAGCAGGTC<br>R:GAATGGGTGGGAGGAGAAAT      | 12        | 155 | 100 | 0.97  | sp Q6EW33.1 PSAJ_NYMAL  | 8e-20   |
| psaC                            | Photosystem I iron-sulfurcenter          | KT200593 | F:TCTTGGGATGGGTGTAAAGC<br>R:GGTTGTCTCATTCCATAAATACA    |           | 135 | 100 | 0.99  | sp P62090.2 PSAC_ARATH  | 4e-41   |
| psbA                            | Photosystem II protein D1                | KT200596 | F:GACTGCAATTTTAGAGAGACGC<br>R:CAGAAGTTGCAGTCAATAAGGTAG | 12        | 137 | 97  | 0.99  | sp P27201.3 PSBA_LANPU  | 5e-71   |

|       |                                         |                |                                                    |    |     |     |      |                                   |          |
|-------|-----------------------------------------|----------------|----------------------------------------------------|----|-----|-----|------|-----------------------------------|----------|
|       | Harvesting Complex gene 1               |                | R:AGTTCATCACCATCGCCTTC                             |    |     |     |      |                                   | B6_ARATH |
| FD    | Ferredoxin, chloroplastic               | KT200600       | F:ATGGTGAGCACCCCCTTC<br>R:GGGTGACGAGCTTGACCTT      | 13 | 148 | 89  | 0.99 | sp Q43517.1 FER 3e-24<br>1_SOLLIC |          |
| rbcL  | RuBisCO large subunit                   | U80688.1       | F:GCTGCCGAATCTTCTACTGG<br>R:CACGTTGGTAACGGAACCTT   | 13 | 176 | 88  | 0.99 | sp P31196.2 RBL 1e-34<br>_NEMMU   |          |
| ATPA  | ATP synthase subunit alpha              | KT200595       | F:TATCTGGCGATCTATTCAAT<br>R:AACTCACGTAATCGTTGACC   |    | 226 | 88  | 0.98 | sp Q02848.1 ATP 3e-28<br>A_ANTSP  |          |
| PEPC  | Phosphoenolpyruvate carboxylase         | KT200592       | F:AAGTTCCTACGCAGGCTTGA<br>R:TGCCATCATTCTAGCCAACA   |    | 174 | 93  | 0.99 | sp P51059.1 CAP 5e-53<br>P2_MAIZE |          |
| SUS   | Sucrose synthase                        | AM29265<br>1.2 | F:GATCCCAAGTTCAACATTGTCT<br>R:CTCGCCATGGAGAAGATGAT |    | 188 | 95  | 0.99 | sp Q41607.1 SUS 3e-27<br>2_TULGE  |          |
| BCA   | Beta carbonic anhydrase                 | KT200602       | F:TACTGGGGTTTCAACCAGGA<br>R:GGCTGTGACCAACGACTAAGA  |    | 153 | 99  | 0.99 | sp Q94CE3.1 BC 1e-38<br>A5_ARATH  |          |
| SOD   | Copper/zinc superoxide dismutase        | KT200606       | F:GGAATGTCACAGCTGCAGAA<br>R:CACCCGCATTTCTGTAGTC    |    | 171 | 94  | 0.99 | sp O04996.3 SO 6e-32<br>DC_SOLCS  |          |
| CAT   | Catalase                                | KT200585       | F:CATCACATGCTGGGTTTCAC<br>R:ACCGATCCTGGACATCTGAC   | 11 | 175 | 84  | 0.99 | sp P49317.1 CAT 8e-33<br>A3_NICPL |          |
| APX7  | L-ascorbate peroxidase 7, chloroplastic | KT200605       | F:AAGAGGGGAGGAGCTAATGG<br>R:GCTGGCAAGCTGAAACAAGT   |    | 150 | 93  | 0.99 | sp Q7XJ02.1 AP 3e-34<br>X7_ORYSJ  |          |
| APX6  | L-ascorbate peroxidase 6                | KT200603       | F:TAATTGCTGTTGCCGGCTCT<br>R:TCCTTTTTACGGAAGCAAC    |    | 161 | 99  | 0.99 | sp Q8GY91.1 AP 6e-24<br>X6_ARATH  |          |
| LBP   | Luminal binding protein                 | KT200583       | F:ACCCGAGCTCGGTTTGAAGA<br>R:ATTCTTGTGCTTCCACCAAC   | 11 | 137 | 90  | 0.99 | sp Q03685.1 BIP 2e-35<br>5_TOBAC  |          |
| GSH-S | Glutathione synthase                    | KT200598       | F:TAGGTTTTGCCAATTCTTGC<br>R:AAGGGGTGGTTCTCCAGAT    | 11 | 213 | 100 | 0.99 | sp P46416.3 GSH 4e-29<br>B_ARATH  |          |
| GR    | Glutathione reductase                   | KT200599       | F:TCCTCCAAGCTTAGTGCTTCA                            |    | 134 | 100 | 0.99 | sp P48642.2 GSH 2e-37             |          |

|     |                         |          |                                                                            |    |     |    |      |                                              |
|-----|-------------------------|----------|----------------------------------------------------------------------------|----|-----|----|------|----------------------------------------------|
| MTP | Metal tolerance protein | KT200586 | R:ACACAACCAGACGGTGTCAA<br>F:CTCGTTTCCTGAGGTTCTGC<br>R:TTTGCTGCTGTCATGGCTAC | 11 | 183 | 91 | 0.99 | RC_ORYSJ<br>sp Q6Z7K5.1 MT 3e-26<br>P3_ORYSJ |
| MT  | Metallothionein         | KT200588 | F:CATGTCGACCTGTGACAACCTG<br>R:TATTAATGGCCACAGGTGCAG                        | 11 | 195 | 96 | 0.99 | sp Q40256.1 MT 2e-22<br>3_MUSAC              |

156

157

159 **REFERENCES**

- 160 1 Pfaffl, M. W., Tichopad, A., Prgomet, C. & Neuvians, T. P. Determination of  
161 stable housekeeping genes, differentially regulated target genes and sample  
162 integrity: BestKeeper – Excel-based tool using pair-wise correlations.  
163 *Biotechnol. Lett.* **26**, 509-515 (2004).
- 164 2 Vandesompele, J. *et al.* Accurate normalization of real-time quantitative RT-  
165 PCR data by geometric averaging of multiple internal control genes. *Genome*  
166 *Biol.* **3**, doi:10.1186/gb-2002-3-7-20 research0034 (2002).
- 167 3 Andersen, C. L., Jensen, J. L. & Orntoft, T. F. Normalization of real-time  
168 quantitative reverse transcription-PCR data: a model-based variance  
169 estimation approach to identify genes suited for normalization, applied to  
170 bladder and colon cancer data sets. *Cancer Res.* **64**, 5245-5250 (2004).
- 171 4 Pfaffl, M. W., Horgan, G. W. & Dempfle, L. Relative expression software tool  
172 (REST (c)) for group-wise comparison and statistical analysis of relative  
173 expression results in real-time PCR. *Nucleic Acids Res.* **75**, 30 (2002).
- 174 5 Hall, T. A. BioEdit: a user friendly biological sequence alignment editor and  
175 analysis program for Windows 95/98/NT. *Nucleic Acids Symposium Series* **41**,  
176 95-98 (1999).
- 177 6 Koressaar, T. & Remm, M. Enhancements and modifications of primer  
178 design program Primer3. *Bioinformatics* **23**, 1289-1291 (2007).
- 179 7 Untergrasser, A. *et al.* Primer3—new capabilities and interfaces. *Nucleic*  
180 *Acids Res.* **40**, e115 (2012).
- 181 8 Serra, I. A. *et al.* Reference genes assessment for the seagrass *Posidonia*  
182 *oceanica* in different salinity, pH and light conditions. *Mar. Biol.* **159**, 1269-  
183 1282, doi:10.1007/s00227-012-1907-8 (2012).

- 184 9 Bustin, S. A. *et al.* MIQE precis: practical implementation of minimum  
185 standard guidelines for fluorescence-based quantitative real-time PCR  
186 experiments. *BMC Mol. Biol.* **11**, 74, doi:10.1186/1471-2199-11-74 (2010).
- 187 10 Pfaffl, M. W. A new mathematical model for relative quantification in real-  
188 time RT-PCR. *Nucleic Acids Res.* **29**, e45-e45 (2001).
- 189 11 Lauritano, C. *et al.* Response of key stress-related genes of the seagrass  
190 *Posidonia oceanica* in the vicinity of submarine volcanic vents.  
191 *Biogeosciences* **12**, 4185-4194, doi:10.5194/bg-12-4185-2015 (2015).
- 192 12 Dattolo, E. *et al.* Response of the seagrass *Posidonia oceanica* to different light  
193 environments: Insights from a combined molecular and photo-physiological  
194 study. *Mar. Environ. Res.* **101**, 225-236, doi:10.1016/j.marenvres.2014.07.010  
195 (2014).
- 196 13 Marín-Guirao, L., Ruiz, J. M., Dattolo, E., Garcia-Munoz, R. & Procaccini, G.  
197 Physiological and molecular evidence of differential short-term heat tolerance  
198 in Mediterranean seagrasses. *Sci. Rep.* **6**, 28615, doi:10.1038/srep28615  
199 (2016).
- 200
